# Supplementary material for: Housing and Demographic Risk Factors Impacting Foot and Musculoskeletal Health in African Elephants [Loxodonta africana] and Asian Elephants [Elephas maximus] in North American Zoos
Source: PubMed Central journal article supplement (PMC4944946; doi:10.1371/journal.pone.0155223), 2016-07-14
Supplement: pone.0155223.s001.pdf [file pone.0155223.s001.pdf]

**Using Science To Understand Zoo Elephant Welfare Study  
Physical Exam Template: Foot and Musculoskeletal Assessment**

**Feet Assessment**

**(Please note any abnormalities on diagrams)**

Key: RF=Right Front; LF=Left Front; RR=Right Rear; LR=Left Rear; NE=Not Evaluated

**Toenails** (length, cracks, defects, horn growth abnormalities)

|          |    |        |          |       |
|----------|----|--------|----------|-------|
| RF:      | NE | Normal | Abnormal | _____ |
| LF:      | NE | Normal | Abnormal | _____ |
| RR:      | NE | Normal | Abnormal | _____ |
| LR:      | NE | Normal | Abnormal | _____ |
| Cuticle: | NE | Normal | Abnormal | _____ |

(Note which foot if abnormal)

**Pads**

|     |           |        |                    |               |           |         |
|-----|-----------|--------|--------------------|---------------|-----------|---------|
| RF: | overgrown | smooth | corrugated surface | discoloration | discharge | no exam |
| LF: | overgrown | smooth | corrugated surface | discoloration | discharge | no exam |
| RR: | overgrown | smooth | corrugated surface | discoloration | discharge | no exam |
| LR: | overgrown | smooth | corrugated surface | discoloration | discharge | no exam |

**Interdigital space** (cracks, growths, ulcers, other abnormalities)

|     |    |        |          |       |
|-----|----|--------|----------|-------|
| RF: | NE | Normal | Abnormal | _____ |
| LF: | NE | Normal | Abnormal | _____ |
| RR: | NE | Normal | Abnormal | _____ |
| LR: | NE | Normal | Abnormal | _____ |

**African and Asian Foot Diagrams** (please note any abnormalities)

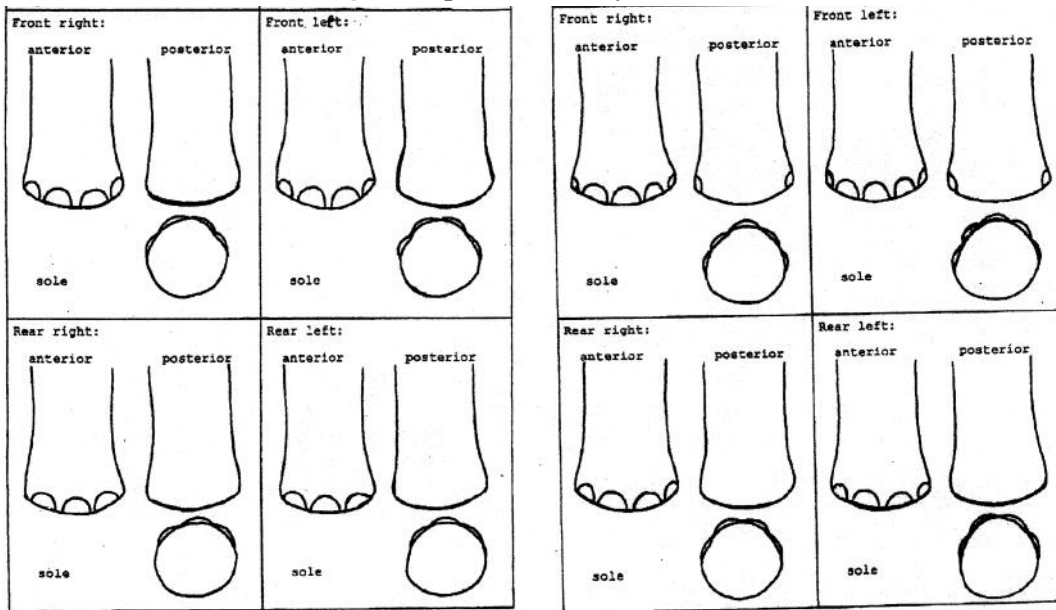

Other comments \_\_\_\_\_  
 Evidence of abnormal weight bearing? NE No Yes \_\_\_\_\_

**Using Science To Understand Zoo Elephant Welfare Study**  
**Physical Exam Template: Foot and Musculoskeletal Assessment**

**Feet Assessment Continued**

**(Please note if there is any stiffness, mechanical limitations, and differences in range of motion)**

**Gait Score:** \_\_\_\_\_ (see categories below).

- 0- No visible signs of lameness or limb abnormality
- 1- Mild lameness, subtle gait change, or limb abnormality
- 2- Severe lameness, obvious gait change or limb deformity, doesn't want to bend, flex, bear weight on limb

Notes:

**Musculoskeletal Assessment**

**(Please note if any swelling, heat, calluses, abscess, fistula, deformity)**

Key: NE=Not Evaluated

|           |    |        |          |       |
|-----------|----|--------|----------|-------|
| Shoulders | NE | Normal | Abnormal | _____ |
| Elbows    | NE | Normal | Abnormal | _____ |
| Carpi     | NE | Normal | Abnormal | _____ |
| Hips      | NE | Normal | Abnormal | _____ |
| Stifles   | NE | Normal | Abnormal | _____ |
| Tarsi     | NE | Normal | Abnormal | _____ |

Other comments \_\_\_\_\_

Evidence of abnormal weight bearing? NE No Yes \_\_\_\_\_

Notes:
